# Supplementary material
Source: PubMed Central journal article supplement (PMC4186801)
Supplement: Supp_Fig1.pdf [file Supp_Fig1.pdf]

## Supplementary Data

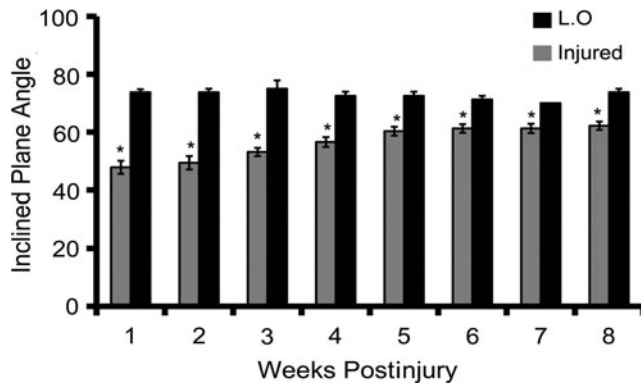

**SUPPLEMENTARY FIG. 1.** Inclined plane shows significant improvement over the recovery period. Injured animals displayed a significant reduction in angle of incline at every time point (two-way analysis of variance;  $p < 0.05$ ). Compared to 1, 2, and 3 weeks postinjury, functional improvement was statistically significant at 4, 5, 6, 7, and 8 weeks post-injury (Tukey's post-hoc test;  $p < 0.05$ ). Asterisks indicate values that are significantly different from laminectomy-only animals (L.O.;  $n = 4$  in L.O. group;  $n = 16$  in injured group). Data are presented as mean  $\pm$  standard error of the mean.
